# Supplementary material for: Stable non-covalent functionalisation of multi-walled carbon nanotubes by pyrene–polyethylene glycol through π–π stacking
Source: Royal Society of Chemistry journal article supplement (doi:10.1039/b813085j), 2008-12-15
Supplement: b813085j.pdf [file b813085j.pdf]

## Supporting information

# Stable Non Covalent Functionalisation of Multi-walled Carbon Nanotube by Pyrene-Polyethylene Glycol through $\pi$ - $\pi$ Stacking

J. Liu<sup>†\*</sup>, O. Bibari<sup>†</sup>, P. Mailley<sup>‡</sup>, J. Dijon<sup>§</sup>, E. Rouvière<sup>§</sup>, F. Sauter-Starace<sup>†</sup>, P. Caillat<sup>†</sup>,  
F. Vinet<sup>†</sup>, and G. Marchand<sup>†</sup>

*CEA-LETI-DTBS Minatec, CEA-LITEN-DTNM, CEA-DSM-DRFMC, 17 rue des  
Martyrs, 38054 Grenoble*

**Figure S1.** (A) NMR spectrum of pyrene-PEG. (B) Mass spectrum of pyrene-PEG.

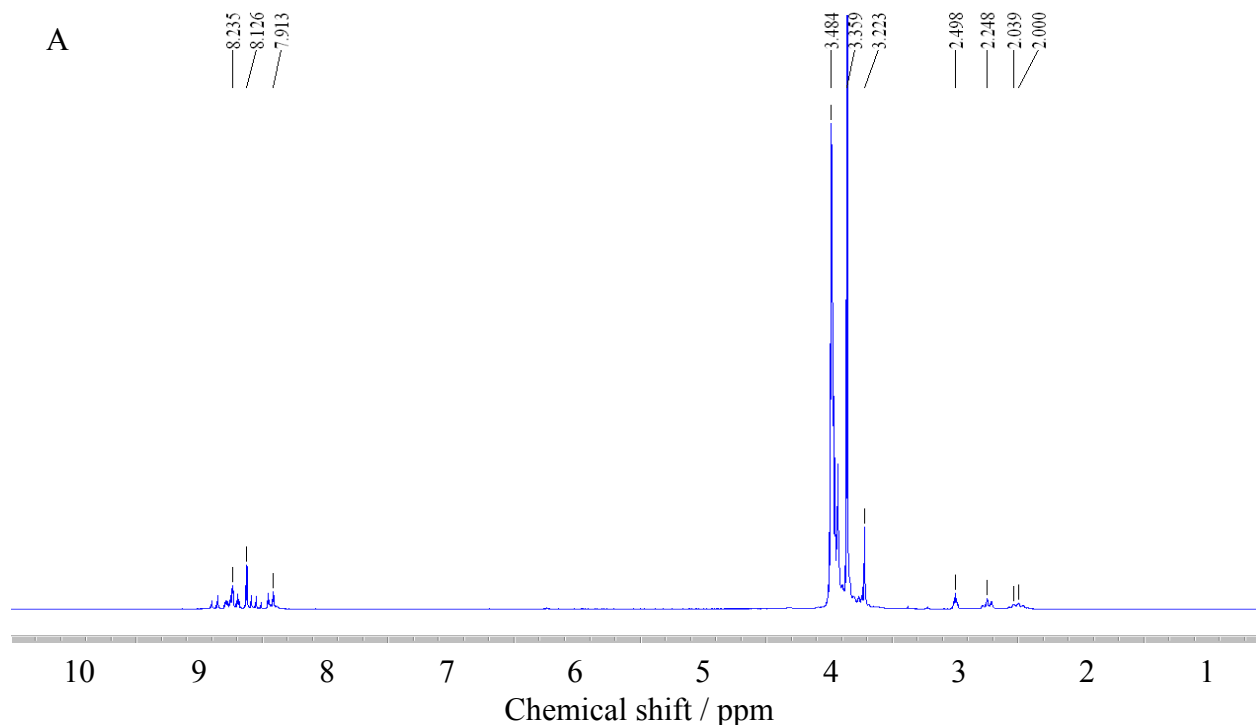

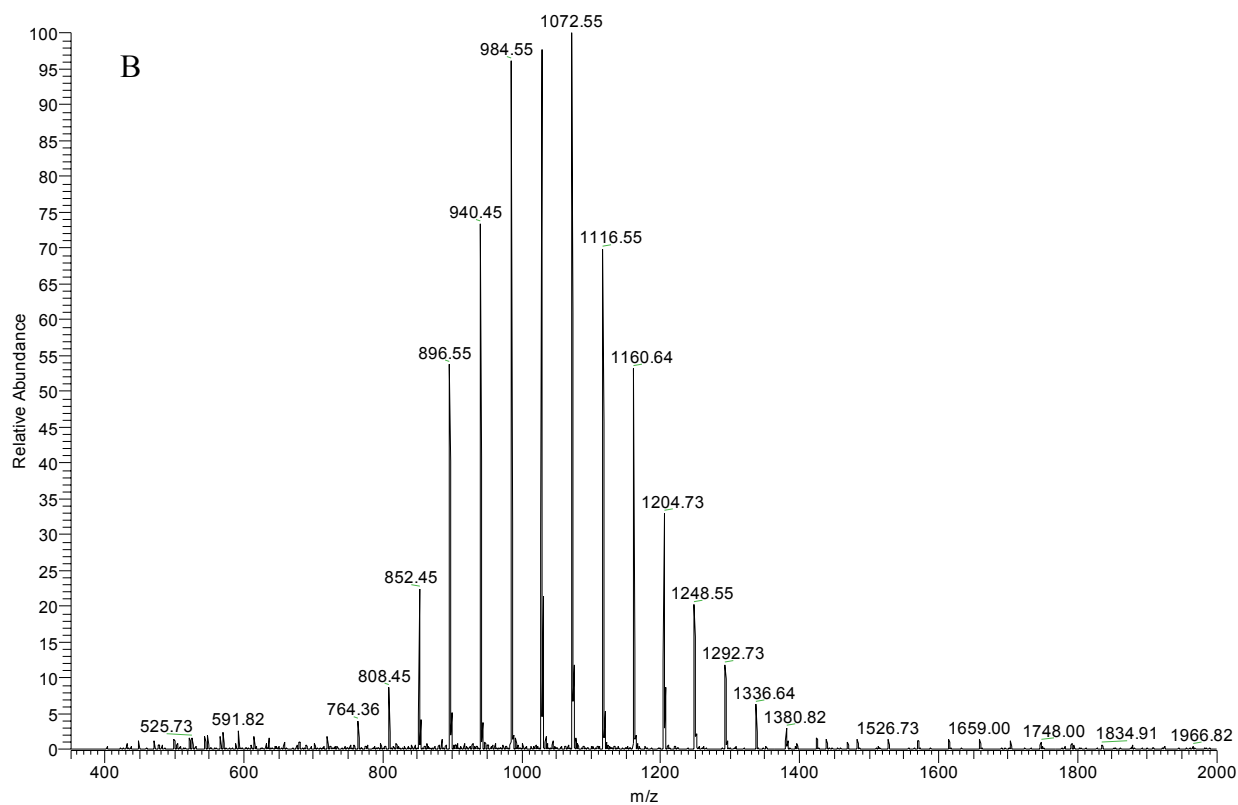

**Figure S2.** Calibration curve of MWNTs in SDS aqueous solution (1 wt%).

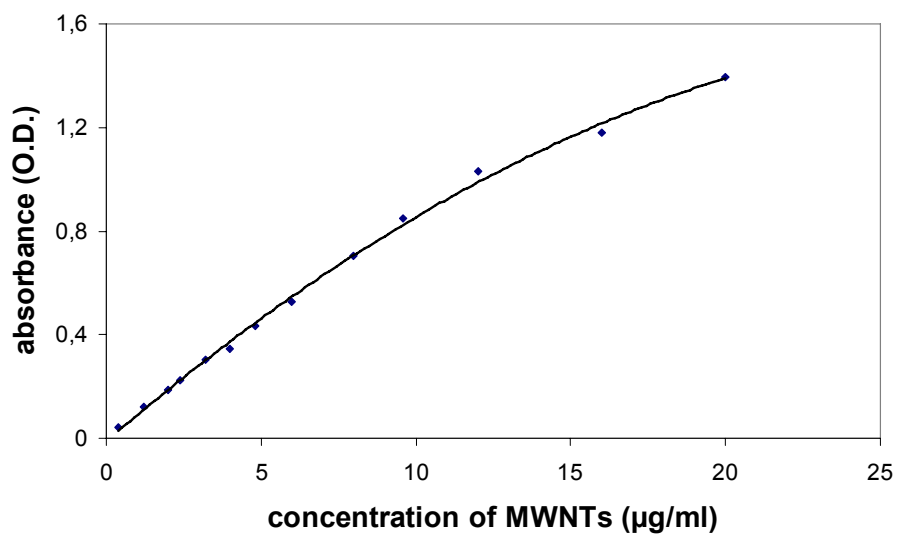

**Figure S3.** TGA curve of MWNT-1 after seven cycles of dialysis.

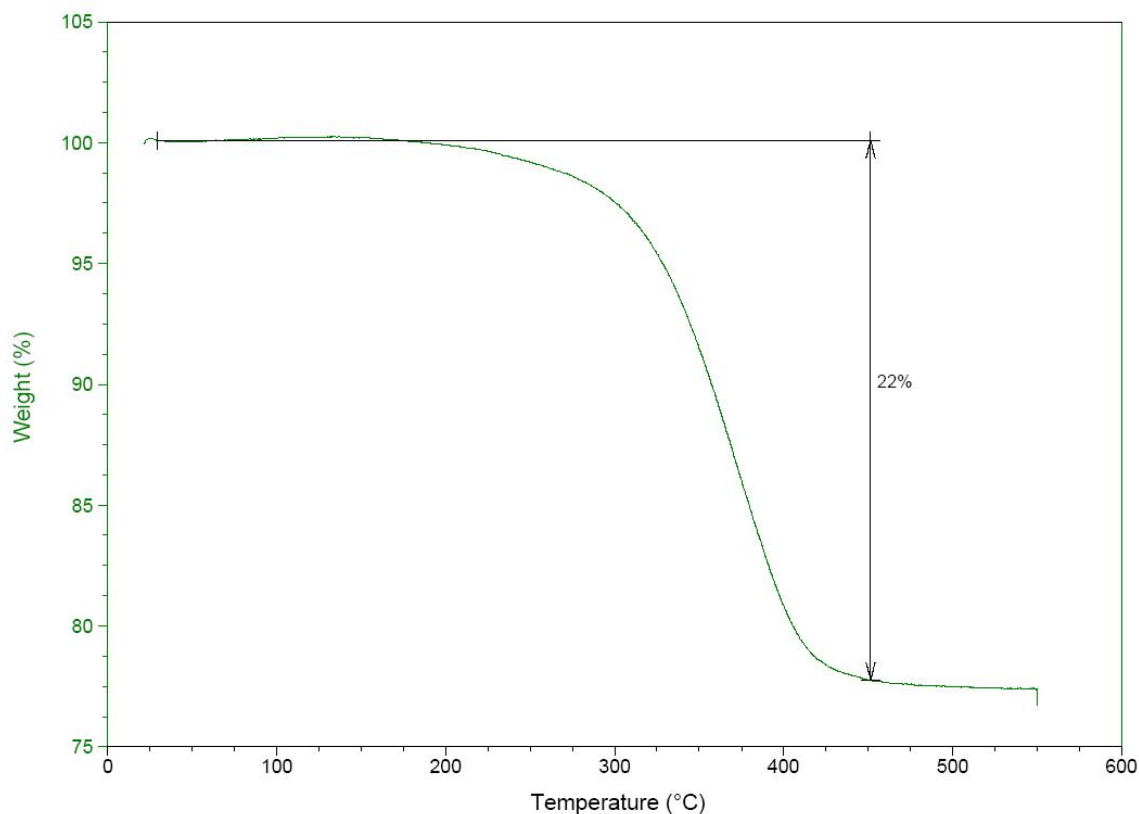

**Figure S4.** Decomposition of XPS C 1s spectra of MWNT arrays (MWNTs/Si) before (A) and after (B) functionalisation by MeO-PEG-NH<sub>2</sub>. It is a control experiment for the functionalization of MWNTs/Si by pyrene-PEG 1. The C-O component does not increase significantly after the functionalization, which suggests that the PEG molecules cannot be functionalized on MWNTs without pyrene.

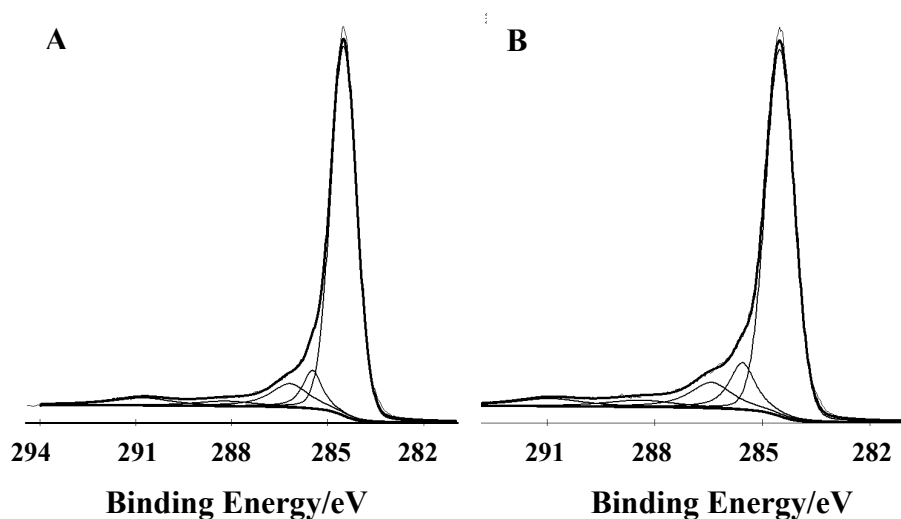

**Figure S5.** Measurements of contact angle with distilled water on the MWNTs/Si surface before (A) and after (B) the functionalization with **1**..

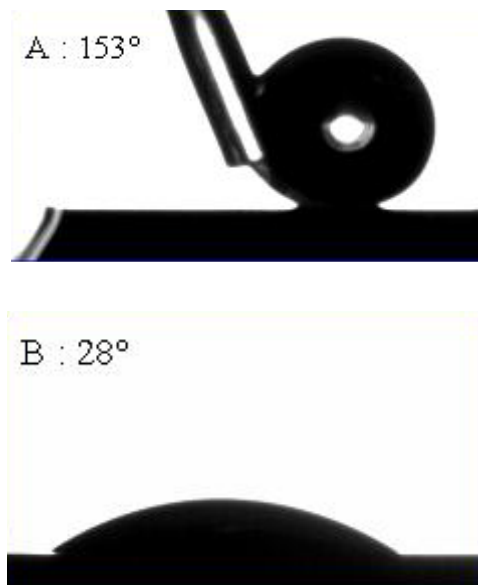

**Table S1.** XPS survey scan results of MWNTs/Si and *f*-MWNTs/Si before and after the adsorption of streptavidin.

|                    |          | Before adsorption |       |        | After adsorption |       |        |
|--------------------|----------|-------------------|-------|--------|------------------|-------|--------|
|                    | XPS Line | BE (eV)           | FWHM  | Atom % | BE (eV)          | FWHM  | Atom % |
| MWNTs/Si           | C 1s     | 284,51            | 0,746 | 95,39  | 284.56           | 0.898 | 81.85  |
|                    | O 1s     | 531,74            | 3,694 | 3,22   | 531.79           | 3.072 | 10.83  |
|                    | N 1s     | 397,42            | 8,002 | 1,39   | 399.72           | 4.445 | 7.32   |
| <i>f</i> -MWNTs/Si | C 1s     | 284,50            | 0,843 | 91,23  | 284.57           | 0.89  | 88.40  |
|                    | O 1s     | 532,41            | 2,998 | 7,18   | 532.38           | 3.02  | 7.78   |
|                    | N 1s     | 398,34            | 7,190 | 1,59   | 400.12           | 3.85  | 3.82   |
